# Supplementary material for: Loss of Corticostriatal Mu-Opioid Receptors in α-Synuclein Transgenic Mouse Brains
Source: Life (Basel). 2022 Jan 3;12(1):63. doi: 10.3390/life12010063 (PMC8781165; doi:10.3390/life12010063)

**Figure S1** Original blot immunoreacted with anti MOR or anti Na<sup>+</sup>/K<sup>+</sup> ATPase antibodies, corresponding to Fig. 2A

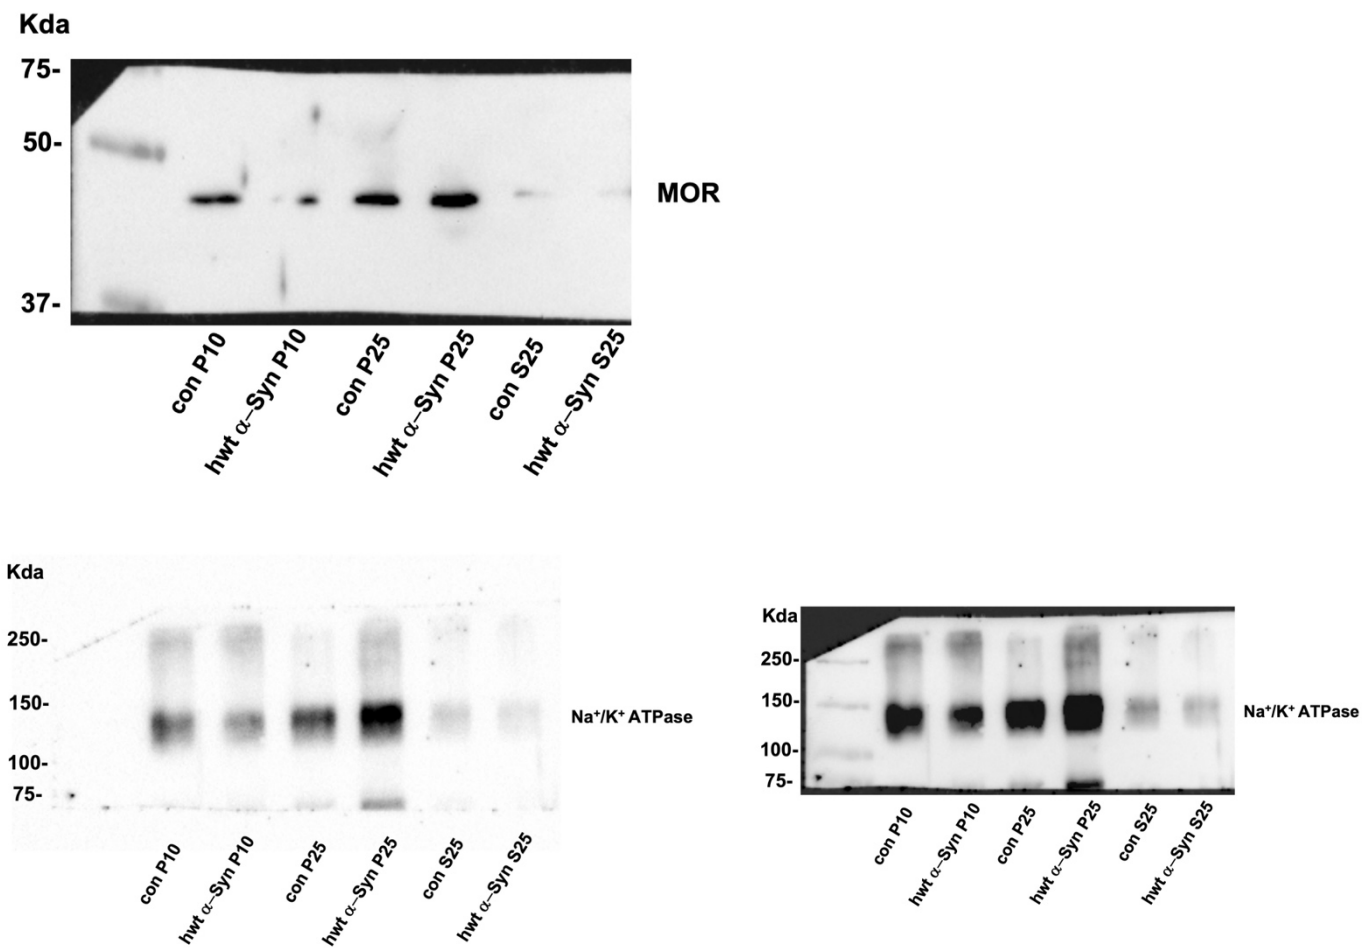

**Figure S2** Original blot immunoreacted with anti MOR or anti Na<sup>+</sup>/K<sup>+</sup> ATPase antibodies, corresponding to Fig. 2A

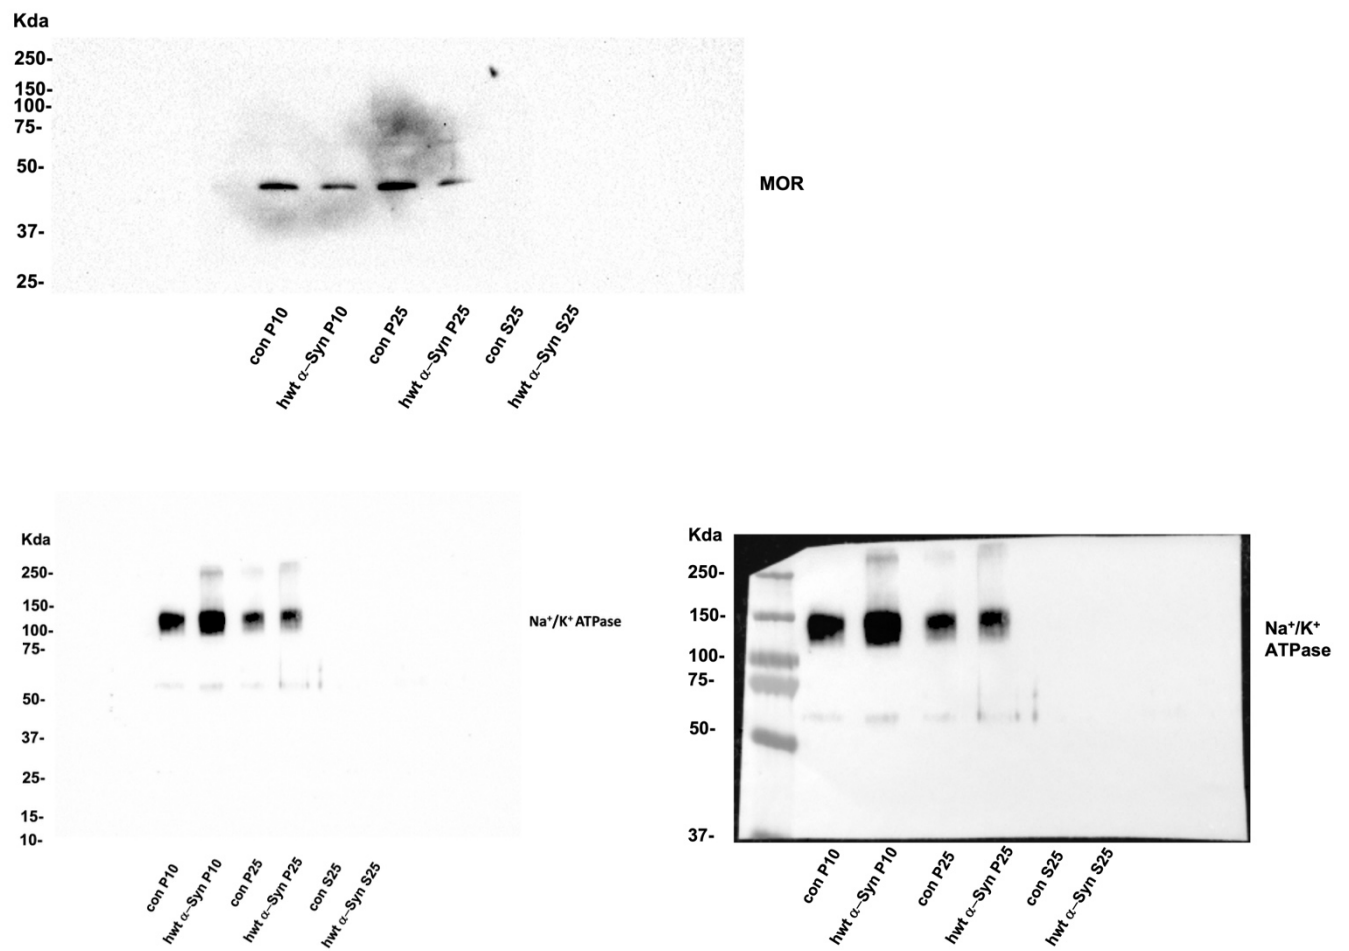

**Figure S3** Original blot immunoreacted with anti CB-28 or anti  $\beta$ -actin antibodies, corresponding to Fig. 2C

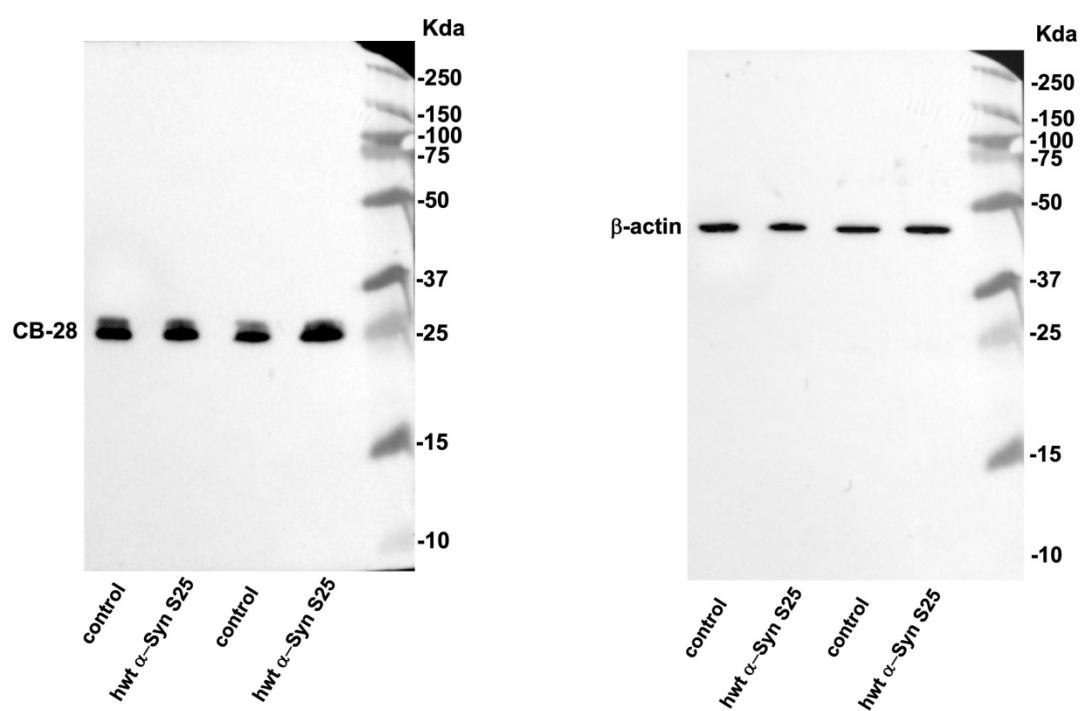

Supplement: Supplementary file 1 [file life-12-00063-s001.zip › life-1490141-supplementary.pdf]
